## RESEARCH ARTICLE

## Prevalence and features of allergic bronchopulmonary aspergillosis, United States, 2016–2022

Kaitlin Benedict<sup>1\*</sup>, Jeremy A. W. Gold<sup>1</sup>, Mitsuru Toda<sup>1</sup>, Joy Hsu<sup>2</sup>

**1** Mycotic Diseases Branch, Division of Foodborne, Waterborne, and Environmental Diseases, National Center for Emerging and Zoonotic Infectious Diseases, Centers for Disease Control and Prevention, Atlanta, Georgia, United States of America, **2** Asthma and Air Quality Branch, Division of Environmental Health Science and Practice, National Center for Environmental Health, Centers for Disease Control and Prevention, Atlanta, Georgia, United States of America

\* [jsy8@cdc.gov](mailto:jsy8@cdc.gov)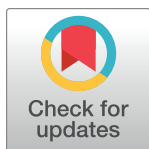

## OPEN ACCESS

**Citation:** Benedict K, Gold JAW, Toda M, Hsu J (2025) Prevalence and features of allergic bronchopulmonary aspergillosis, United States, 2016–2022. PLoS ONE 20(1): e0317054. <https://doi.org/10.1371/journal.pone.0317054>

**Editor:** De-Chih Lee, Dayeh University, TAIWAN

**Received:** October 16, 2024

**Accepted:** December 19, 2024

**Published:** January 15, 2025

**Copyright:** This is an open access article, free of all copyright, and may be freely reproduced, distributed, transmitted, modified, built upon, or otherwise used by anyone for any lawful purpose. The work is made available under the [Creative Commons CC0](https://creativecommons.org/licenses/by/4.0/) public domain dedication.

**Data Availability Statement:** This study used third-party data that we cannot legally distribute. All relevant summary data are within the paper and the [Supporting Information](#). The raw data underlying the results presented are available from the Merative MarketScan® Research Databases: <https://www.merative.com/documents/brief/marketscan-explainer-general>. Others can access the data by going to this website and contacting Merative. The authors did not have any special access privileges that others would not have.

**Funding:** The author(s) received no specific funding for this work.

## Abstract

The epidemiology of allergic bronchopulmonary aspergillosis (ABPA) in the United States is not well-described. To estimate national ABPA prevalence among patients with asthma or cystic fibrosis, characterize ABPA testing practices, and describe ABPA clinical features, treatment, and 6-month outcomes. We used the 2016–2022 Merative™ MarketScan® Commercial/Medicare and Multi-State Medicaid Databases to identify cohorts of patients with 1) asthma, 2) cystic fibrosis (CF), and 3) ABPA. We calculated ABPA prevalence per 10,000 patients with asthma or CF, assessed diagnostic testing for ABPA among patients with severe asthma, and described features of patients with ABPA using diagnosis and procedure codes. The overall ABPA prevalence among patients with asthma was 2.8/10,000 (Commercial/Medicare) and 1.0/10,000 (Medicaid). ABPA prevalence increased with asthma severity (Commercial/Medicare: mild 1.3, moderate 9.3, severe 70.6, Medicaid: mild 0.3, moderate 2.4, severe 32.4). Among patients with CF, ABPA prevalence was 183.7/10,000 (Commercial/Medicare) and 134.6/10,000 (Medicaid). Among patients with severe asthma, 10.3% (Commercial/Medicare) and 7.4% (Medicaid) received total immunoglobulin E testing, which is recommended for ABPA diagnosis. Among all patients with ABPA (Commercial/Medicare: n = 1,564, Medicaid: n = 410), ABPA treatments included inhaled corticosteroids (>70%), systemic corticosteroids (>62%), and antifungals (>18%). Patients with ABPA and Medicaid were more likely to experience hospitalization (45.1% vs. 22.5% of patients with Commercial/Medicare insurance) and respiratory failure (18.5% vs. 10.9%). This analysis provides initial estimates of national ABPA prevalence. Further studies could identify potential barriers to ABPA testing and investigate potential factors affecting payer-related differences in ABPA burden.

**Competing interests:** The authors have declared that no competing interests exist.

## Introduction

Allergic bronchopulmonary aspergillosis (ABPA) is a pulmonary disorder caused by hypersensitivity to colonization of the airways with *Aspergillus* spp, a common environmental mold. ABPA primarily occurs among people with asthma or cystic fibrosis (CF) and can cause substantial morbidity. ABPA often presents as poorly controlled asthma, but other clinical features can include bronchiectasis and peripheral eosinophilia. Clinical complications include pulmonary hypertension and respiratory failure. Treatment includes systemic corticosteroids or antifungals. Diagnosis can be challenging and involves compatible clinical and radiological findings and laboratory results including total serum immunoglobulin E (IgE), *Aspergillus*-specific IgE and IgG, and eosinophilia. Testing for ABPA is recommended for certain patients with asthma in tertiary care settings [1, 2] and yearly screening is recommended for patients with CF [3], but testing practices in the United States have not been described using real-world data.

Globally, ABPA is estimated to affect >4.8 million people, including 1.4 million cases in the Americas [4]. This figure is based on a multi-country average ABPA prevalence of 2.5% among adults with asthma. However, recent data about the prevalence and other epidemiologic features of ABPA in the United States are lacking. According to a recent review [5], no estimates of ABPA prevalence among patients with asthma have been documented in the literature since the 1970s, which included a small study at a single specialty clinic [6]. To address this knowledge gap, we analyzed two large U.S. health insurance claims databases to estimate ABPA prevalence, describe the epidemiologic and clinical features of patients with ABPA, and describe testing patterns for ABPA among patients with severe asthma.

## Methods

We used the Merative™ MarketScan® Commercial/Medicare, and Multi-State Medicaid Databases (<https://www.merative.com/documents/brief/marketscan-explainer-general>). The Commercial/Medicare database contains health insurance claims data including inpatient and outpatient visits and outpatient prescriptions for >51 million employees, dependents, and retirees with employer-sponsored plans including Medicare Supplemental and Medicare Advantage plans throughout the United States during July 1, 2016 to July 1, 2022 study window. The Medicaid database contains similar information for >16 million patients across several geographically dispersed states during the same time frame. MarketScan data are fully de-identified, so this analysis was not subject to review by the Centers for Disease Control and Prevention institutional review board.

Using International Classification of Diseases, Tenth Revision, Clinical Modification (ICD-10-CM) codes (S1 Table), we identified cohorts of patients diagnosed with either 1) asthma, stratified by severity, 2) cystic fibrosis (CF), or 3) ABPA during the study window who had continuous insurance enrollment in the 180 days before and after their first diagnosis code for the condition of interest (index date). Patients for whom the condition of interest was listed on a laboratory or imaging claim alone were excluded from the cohort to decrease likelihood of misclassification.

For the asthma and CF cohorts, we calculated ABPA prevalence per 10,000 patients, stratified by demographic characteristics and insurance type. Using both databases, we also assessed ordering for ABPA-related diagnostic testing among patients with severe asthma or cystic fibrosis using Current Procedural Terminology (CPT) codes documented in the 60 days before to 60 days after the index date. For the ABPA cohort, we examined patient demographic characteristics, other selected concomitant diagnoses using ICD-10-CM codes, diagnostic testing, outpatient medications, and outcomes. Geographic data (Census region and rural

classification) are unavailable in the Medicaid database, and race/ethnicity data are unavailable in the Commercial/Medicare database. The Commercial/Medicare and Medicaid databases were not combined or compared with statistical testing because of the different sampling methodology.

## Results

### ABPA prevalence

The overall prevalence of ABPA among patients with any asthma diagnosis was 2.8/10,000 patients ( $n = 715/2,527,072$ ) in the Commercial/Medicare database (Table 1) and 1.0/10,000 ( $n = 163/1,631,142$ ) in the Medicaid database (Table 2). ABPA prevalence increased with increasing asthma severity (Commercial/Medicare: mild 1.3, moderate 9.3, severe 70.6, Medicaid: mild 0.3, moderate 2.4, severe 32.4). ABPA prevalence was typically highest among adults  $\geq 45$  years and higher among males vs. females, with the most pronounced difference among patients with severe asthma in the Commercial/Medicare database (males: 82.9, females: 62.1). In the Commercial/Medicare database, ABPA prevalence among patients with moderate asthma was highest in the West (14.1), and ABPA prevalence among patients with severe asthma was highest in the Midwest (89.9). ABPA prevalence was similar in rural vs. non-rural areas among patients with mild and moderate asthma but was higher in rural vs. non-rural areas (90.0 vs. 61.4) among patients with severe asthma. In the Medicaid database, ABPA prevalence among patients with severe asthma was highest among non-Hispanic Black patients (36.5, vs. 26.3 among non-Hispanic White patients and 22.1 among Hispanic/Latino patients).

**Table 1. ABPA rates<sup>a</sup> per 10,000 patients with Commercial/Medicare insurance and asthma or cystic fibrosis.**

|                               | Asthma            |                  |                  |                  |                      | Cystic fibrosis |
|-------------------------------|-------------------|------------------|------------------|------------------|----------------------|-----------------|
|                               | Any               | Mild             | Moderate         | Severe           | Unspecified severity |                 |
| Total                         | 715/2527072 (2.8) | 113/860619 (1.3) | 142/152146 (9.3) | 112/15856 (70.6) | 385/1538311 (2.5)    | 97/5279 (183.7) |
| Sex                           |                   |                  |                  |                  |                      |                 |
| Male                          | 319/1057050 (3.0) | 48/385218 (1.2)  | 68/64328 (10.6)  | 54/6511 (82.9)   | 169/619305 (2.7)     | 51/2483 (205.4) |
| Female                        | 396/1470022 (2.7) | 65/475401 (1.4)  | 74/87818 (8.4)   | 58/9345 (62.1)   | 216/919006 (2.4)     | 46/2796 (164.5) |
| Age group in years            |                   |                  |                  |                  |                      |                 |
| <18                           | 37/676654 (0.5)   | 4/304089 (0.1)   | 6/32743 (1.8)    | 5/2131 (23.5)    | 24/356641 (0.7)      | 31/1769 (175.2) |
| 18 to 44                      | 159/859702 (1.8)  | 23/275992 (0.8)  | 20/23393 (8.5)   | 23/4323 (53.2)   | 101/542846 (1.9)     | 50/2189 (228.4) |
| 45 to 64                      | 390/809270 (4.8)  | 31/120946 (2.6)  | 74/58768 (12.6)  | 68/7320 (92.9)   | 198/515725 (3.8)     | 15/1059 (141.6) |
| $\geq 65$                     | 129/181446 (7.1)  | 14/44467 (3.1)   | 42/13849 (30.3)  | 16/2082 (76.8)   | 62/123099 (5.0)      | 1/262 (38.2)    |
| US census region <sup>b</sup> |                   |                  |                  |                  |                      |                 |
| Northeast                     | 117/473609 (2.5)  | 21/171971 (1.2)  | 20/25350 (7.9)   | 16/2396 (66.8)   | 63/281491 (2.2)      | 14/1087 (128.8) |
| Midwest                       | 147/530286 (2.8)  | 22/118382 (1.9)  | 29/34690 (8.4)   | 32/3561 (89.9)   | 83/312966 (2.7)      | 24/1124 (213.5) |
| South                         | 227/982408 (2.3)  | 39/320896 (1.2)  | 42/58657 (7.2)   | 36/6249 (57.6)   | 119/612137 (1.9)     | 29/2025 (143.2) |
| West                          | 160/408545 (3.9)  | 21/140417 (1.5)  | 34/24079 (14.1)  | 17/2346 (72.5)   | 90/247215 (3.6)      | 24/746 (321.7)  |
| Unknown                       | 64/132224 (4.8)   | 9/38953 (2.3)    | 17/9370 (18.1)   | 11/1304 (84.4)   | 30/84052 (3.6)       | 6/297 (202.0)   |
| Rural classification          |                   |                  |                  |                  |                      |                 |
| Non-rural                     | 488/1799133 (2.7) | 84/628246 (1.3)  | 91/106824 (8.5)  | 66/10748 (61.4)  | 270/1081982 (2.5)    | 66/3715 (177.7) |
| Rural                         | 62/252648 (2.5)   | 8/74182 (1.1)    | 13/15605 (8.3)   | 15/1667 (90.0)   | 29/164648 (1.8)      | 9/586 (153.6)   |
| Unknown                       | 165/475291 (3.5)  | 21/158191 (1.3)  | 38/29717 (12.8)  | 31/3441 (90.1)   | 86/291681 (2.9)      | 22/978 (224.9)  |

<sup>a</sup> table shows numerator/denominator (rate per 10,000)

<sup>b</sup> of primary beneficiary's residence

<https://doi.org/10.1371/journal.pone.0317054.t001>

Table 2. ABPA rates<sup>a</sup> per 10,000 patients with Medicaid and asthma or cystic fibrosis.

|                          | Asthma            |                 |                |                |                      | Cystic fibrosis |
|--------------------------|-------------------|-----------------|----------------|----------------|----------------------|-----------------|
|                          | Any               | Mild            | Moderate       | Severe         | Unspecified severity |                 |
| Total                    | 163/1631142 (1.0) | 15/554302 (0.3) | 22/90034 (2.4) | 28/8636 (32.4) | 111/1028613 (1.1)    | 54/4013 (134.6) |
| Sex                      |                   |                 |                |                |                      |                 |
| Male                     | 89/738416 (1.2)   | 10/279874 (0.4) | 11/43447 (2.5) | 13/3949 (32.9) | 64/437852 (1.5)      | 31/1887 (164.3) |
| Female                   | 74/892726 (0.8)   | 5/274428 (0.2)  | 11/46587 (2.4) | 15/4687 (32.0) | 47/590761 (0.8)      | 23/2126 (108.2) |
| Age group in years       |                   |                 |                |                |                      |                 |
| <18                      | 54/1022654 (0.5)  | 9/429497 (0.2)  | 13/59037 (2.2) | 10/4438 (22.5) | 32/571571 (0.6)      | 27/2363 (114.3) |
| 18 to 44                 | 62/423842 (1.5)   | 4/89543 (0.4)   | 6/18477 (3.2)  | 7/2214 (31.6)  | 46/319879 (1.4)      | 26/1356 (191.7) |
| 45 to 64                 | 42/175733 (2.4)   | 2/33596 (0.6)   | 2/11925 (1.7)  | 11/1892 (58.1) | 29/130509 (2.2)      | 1/156 (64.1)    |
| ≥65                      | 5/8913 (5.6)      | 0/1666 (0.0)    | 1/595 (16.8)   | 0/92 (0.0)     | 4/6654 (6.0)         | 0/24 (0.0)      |
| Race/ethnicity           |                   |                 |                |                |                      |                 |
| Black, non-Hispanic      | 56/589547 (0.9)   | 6/213220 (0.3)  | 8/33083 (2.4)  | 13/3563 (36.5) | 38/362609 (1.0)      | 4/623 (64.2)    |
| Hispanic or Latino       | 12/107817 (1.1)   | 2/42205 (0.5)   | 3/5885 (5.1)   | 1/452 (22.1)   | 8/63209 (1.3)        | 4/177 (226.0)   |
| Other race, non-Hispanic | 1/64267 (0.2)     | 0/25109 (0.0)   | 0/3556 (0.0)   | 0/321 (0.0)    | 1/37282 (0.3)        | 1/98 (102.0)    |
| White, non-Hispanic      | 68/726349 (0.9)   | 3/227164 (0.1)  | 8/38786 (2.1)  | 9/3425 (26.3)  | 49/474081 (1.0)      | 36/2493 (144.4) |
| Unknown                  | 26/143162 (1.8)   | 4/46604 (0.9)   | 3/8724 (3.4)   | 5/875 (57.1)   | 15/91432 (1.6)       | 9/622 (144.7)   |

<sup>a</sup> table shows numerator/denominator (rate per 10,000)

<https://doi.org/10.1371/journal.pone.0317054.t002>

Among patients with cystic fibrosis, the overall prevalence of ABPA was 183.7/10,000 patients ( $n = 97/5,279$ ) in the Commercial/Medicare database and 134.6/10,000 in the Medicaid database ( $n = 54/4,013$ ). ABPA prevalence among patients with CF was highest among adults ages 18–44 years (Commercial/Medicare: 228.4, Medicaid: 191.7) and males (Commercial/Medicare: 205.4 vs. 164.5 in females, Medicaid: 164.3 vs. 108.2 in females). In the Commercial/Medicare database, ABPA prevalence among patients with CF was highest in the West (321.7).

### ABPA-related testing among patients with severe asthma or cystic fibrosis

Among patients with severe asthma (Commercial/Medicare:  $n = 15,856$ , Medicaid:  $n = 8,636$ ), 10.3% and 7.4%, respectively, received total serum IgE testing, 6.5% and 5.6% received allergen specific IgE testing, and 1.0% and 0.5% received testing for *Aspergillus* precipitating antibodies (Table 3).

Among patients with cystic fibrosis (Commercial/Medicare:  $n = 5,279$ , Medicaid:  $n = 4,013$ ), 15.2% and 11.2%, respectively, received total serum IgE testing, 2.7% and 1.6% received allergen specific IgE testing, and 0.8% and 0.2% received testing for *Aspergillus* precipitating antibodies.

### Features of patients with ABPA

Among all patients with ABPA and commercial/Medicare insurance ( $n = 1,564$ ), the most common specified provider types visited on the index date were pulmonologists (36.6%) and acute care hospitals (35.5%). In contrast, among patients with ABPA and Medicaid insurance ( $n = 410$ ), acute care hospitals (51.0%) were the most common specified provider type on the index date (Table 4). ABPA index dates most frequently occurred in the summer (Commercial/Medicare: 32.7%, Medicaid: 30.0%).

The most frequent associated diagnoses were asthma (75.1%), allergic rhinitis (46.4%), bronchiectasis (41.5%), and hypertension (38.9%) among patients with ABPA and commercial/Medicare insurance. Among patients with Medicaid, the most common associated diagnoses were

Table 3. ABPA-related diagnostic testing<sup>a</sup> among patients with severe asthma or cystic fibrosis, by health insurance type.

|                                                    | Severe asthma       |               | Cystic fibrosis     |               |
|----------------------------------------------------|---------------------|---------------|---------------------|---------------|
|                                                    | Commercial/Medicare | Medicaid      | Commercial/Medicare | Medicaid      |
|                                                    | n = 15,856 (%)      | n = 8,636 (%) | n = 5,279 (%)       | n = 4,013 (%) |
| <i>Aspergillus</i> precipitating antibodies        | 152 (1.0%)          | 42 (0.5%)     | 41 (0.8%)           | 9 (0.2%)      |
| Fungal culture                                     | 171 (1.1%)          | 68 (0.8%)     | 583 (11.0%)         | 241 (6.0%)    |
| Microscopy                                         | 492 (3.1%)          | 234 (2.7%)    | 1,255 (23.8%)       | 726 (18.1%)   |
| <i>Aspergillus</i> galactomannan antigen detection | 19 (0.1%)           | 8 (0.1%)      | 36 (0.7%)           | 12 (0.3%)     |
| Serum immunoglobulin E (IgE)                       | 1,631 (10.3%)       | 642 (7.4%)    | 802 (15.2%)         | 448 (11.2%)   |
| Allergen-specific IgE                              | 1,025 (6.5%)        | 484 (5.6%)    | 142 (2.7%)          | 66 (1.6%)     |
| Chest CT                                           | 1,328 (8.4%)        | 426 (4.9%)    | 499 (9.5%)          | 272 (6.8%)    |
| Spirometry                                         | 7,013 (44.2%)       | 3,140 (36.4%) | 2,345 (44.4%)       | 1,423 (35.5%) |
| Bronchoscopy                                       | 200 (1.3%)          | 110 (1.3%)    | 190 (3.6%)          | 146 (3.6%)    |

ABPA: allergic bronchopulmonary aspergillosis; CT: computed tomography; IgE: immunoglobulin E

<sup>a</sup> In the 60 days before to 60 days after the first severe asthma or CF diagnosis in the study window

<https://doi.org/10.1371/journal.pone.0317054.t003>

asthma (75.4%), allergic rhinitis (46.3%), pneumonia (42.4%), and gastrointestinal reflux disease (42.0%). Cystic fibrosis occurred in 11.7% of patients with commercial/Medicare insurance and 29.8% of patients with Medicaid; 18.5% and 12.7% of patients with commercial/Medicare insurance and Medicaid, respectively, did not have diagnosis codes for either CF or asthma.

Diagnostic testing included *Aspergillus* precipitating antibodies (Commercial/Medicare: 17.3%, Medicaid: 8.3%), total serum IgE (Commercial/Medicare: 40.5%, Medicaid: 30.6%), and allergen specific IgE (Commercial/Medicare: 22.3%, Medicaid: 21.5%). Most patients were prescribed inhaled (Commercial/Medicare: 70.7%, Medicaid: 72.2%) or systemic (Commercial/Medicare: 62.0%, Medicaid: 64.9%) corticosteroids. The median days' supply for systemic steroids was 56 (interquartile range [IQR] 18–128) days for patients with commercial/Medicare insurance and 49 (IQR 14–117) days for patients with Medicaid. Antifungals, most commonly itraconazole, were prescribed for 25.4% of patients with commercial/Medicare insurance and 18.8% of patients with Medicaid; 20.0% of patients with commercial/Medicare insurance and 15.6% of patients with Medicaid received both antifungals and systemic corticosteroids. The median days' supply for itraconazole was 90 days (IQR: 30–120) for patients with commercial/Medicare insurance and 60 days (IQR 30–133.5) for patients with Medicaid. Approximately 2% were prescribed interleukin (IL)-5 agents and an additional 8% of patients in each cohort were prescribed other monoclonal antibodies.

On or in the 180 days after the index date, 22.5% of patients with commercial/Medicare insurance and 45.1% of patients with Medicaid were hospitalized, 10.9% of patients with commercial/Medicare insurance and 18.5% of patients with Medicaid experienced respiratory failure, approximately 2% of patients in each cohort developed invasive aspergillosis, and patients from both cohorts had a median of 13 additional healthcare visits. Most (Commercial/Medicare: 59.5%, Medicaid: 56.6%) patients had more than one additional healthcare visit with an ABPA diagnosis code; among those, the median time between the index date and the last ABPA visit was 119 days (IQR 59–55) for patients with commercial/Medicare insurance and 115 days (IQR 53–154) for patients with Medicaid.

## Discussion

This analysis of two large health insurance claims databases provides initial estimates of the prevalence of ABPA among patients with asthma or CF and offers preliminary insight into

Table 4. Demographic characteristics, clinical features, treatments, and outcomes among patients with ABPA, by health insurance type.

| Characteristic                                                     | Commercial/Medicare |       | Medicaid |       |
|--------------------------------------------------------------------|---------------------|-------|----------|-------|
|                                                                    | n = 1,564           | %     | n = 410  | %     |
| Sex                                                                |                     |       |          |       |
| Male                                                               | 708                 | 45.3% | 203      | 49.5% |
| Female                                                             | 856                 | 54.7% | 207      | 50.5% |
| Age group in years                                                 |                     |       |          |       |
| <18                                                                | 78                  | 5.0%  | 123      | 30.0% |
| 18 to 44                                                           | 342                 | 21.9% | 152      | 37.1% |
| 45 to 64                                                           | 841                 | 53.8% | 124      | 30.2% |
| ≥65                                                                | 303                 | 19.4% | 11       | 2.7%  |
| US census region of primary beneficiary's residence                |                     |       |          |       |
| Northeast                                                          | 220                 | 14.1% | n/a      | n/a   |
| Midwest                                                            | 335                 | 21.4% | n/a      | n/a   |
| South                                                              | 521                 | 33.3% | n/a      | n/a   |
| West                                                               | 359                 | 23.0% | n/a      | n/a   |
| Unknown                                                            | 129                 | 8.2%  | n/a      | n/a   |
| Urban/rural classification                                         |                     |       |          |       |
| Non-rural                                                          | 1,059               | 67.7% | n/a      | n/a   |
| Rural                                                              | 149                 | 9.5%  | n/a      | n/a   |
| Unknown                                                            | 356                 | 22.8% | n/a      | n/a   |
| Race/ethnicity                                                     |                     |       |          |       |
| Black, non-Hispanic                                                | n/a                 | n/a   | 133      | 32.4% |
| Hispanic or Latino                                                 | n/a                 | n/a   | 30       | 7.3%  |
| Other race, non-Hispanic                                           | n/a                 | n/a   | 12       | 2.9%  |
| White, non-Hispanic                                                | n/a                 | n/a   | 184      | 44.9% |
| Unknown                                                            | n/a                 | n/a   | 51       | 12.4% |
| Season of ABPA diagnosis                                           |                     |       |          |       |
| Winter                                                             | 344                 | 22.0% | 95       | 23.2% |
| Spring                                                             | 303                 | 19.4% | 86       | 21.0% |
| Summer                                                             | 511                 | 32.7% | 123      | 30.0% |
| Fall                                                               | 406                 | 26.0% | 106      | 25.9% |
| Provider type(s) on day of ABPA diagnosis (not mutually exclusive) |                     |       |          |       |
| Acute care hospital                                                | 556                 | 35.5% | 209      | 51.0% |
| Allergy/immunology                                                 | 152                 | 9.7%  | 6        | 1.5%  |
| Family practice or internal medicine                               | 328                 | 21.0% | 25       | 6.1%  |
| Laboratory                                                         | 123                 | 7.9%  | 14       | 3.4%  |
| Other                                                              | 510                 | 32.6% | 239      | 58.3% |
| Pediatrician                                                       | 69                  | 4.4%  | 31       | 7.6%  |
| Pulmonary disease                                                  | 573                 | 36.6% | 21       | 5.1%  |
| Radiology                                                          | 149                 | 9.5%  | 12       | 2.9%  |
| Unknown                                                            | 33                  | 2.1%  | 93       | 22.7% |
| Conditions in the 180 days before to 180 days after ABPA diagnosis |                     |       |          |       |
| Acute sinusitis                                                    | 286                 | 18.3% | 47       | 11.5% |
| Acute upper respiratory infection                                  | 218                 | 13.9% | 83       | 20.2% |
| Allergic rhinitis                                                  | 726                 | 46.4% | 190      | 46.3% |
| Anxiety disorder                                                   | 259                 | 16.6% | 106      | 25.9% |
| Asthma                                                             | 1,175               | 75.1% | 309      | 75.4% |
| Mild                                                               | 185                 | 11.8% | 35       | 8.5%  |

(Continued)

Table 4. (Continued)

| Characteristic                                                               | Commercial/Medicare |       | Medicaid |       |
|------------------------------------------------------------------------------|---------------------|-------|----------|-------|
|                                                                              | n = 1,564           | %     | n = 410  | %     |
| Moderate                                                                     | 274                 | 17.5% | 57       | 13.9% |
| Severe                                                                       | 162                 | 10.4% | 52       | 12.7% |
| Unspecified severity                                                         | 564                 | 36.1% | 175      | 42.7% |
| Bronchiectasis                                                               | 649                 | 41.5% | 145      | 35.4% |
| Chronic obstructive pulmonary disease (COPD)                                 | 465                 | 29.7% | 135      | 32.9% |
| Chronic sinusitis                                                            | 445                 | 28.5% | 98       | 23.9% |
| Cystic fibrosis                                                              | 185                 | 11.8% | 122      | 29.8% |
| Depression                                                                   | 212                 | 13.6% | 101      | 24.6% |
| Diabetes                                                                     | 286                 | 18.3% | 89       | 21.7% |
| Eosinophilia                                                                 | 141                 | 9.0%  | 43       | 10.5% |
| Functional disorders of polymorphonuclear neutrophils                        | 10                  | 0.6%  | 2        | 0.5%  |
| Gastroesophageal reflux disease (GERD)                                       | 534                 | 34.1% | 172      | 42.0% |
| Hyper-IgE syndrome                                                           | 30                  | 1.9%  | 7        | 1.7%  |
| Hypertension                                                                 | 609                 | 38.9% | 137      | 33.4% |
| Hypothyroidism                                                               | 246                 | 15.7% | 23       | 5.6%  |
| Liver disease                                                                | 134                 | 8.6%  | 53       | 12.9% |
| Lung transplant                                                              | 12                  | 0.8%  | 1        | 0.2%  |
| Nontuberculous mycobacteria infection                                        | 83                  | 5.3%  | 17       | 4.1%  |
| Overweight and obesity                                                       | 242                 | 15.5% | 85       | 20.7% |
| Pneumonia                                                                    | 540                 | 34.5% | 174      | 42.4% |
| Smoking (current or past)                                                    | 246                 | 15.7% | 129      | 31.5% |
| Vitamin D deficiency                                                         | 267                 | 17.1% | 85       | 20.7% |
| Diagnostic testing in the 60 days before to 60 days after ABPA diagnosis     |                     |       |          |       |
| <i>Aspergillus</i> precipitating antibodies                                  | 271                 | 17.3% | 34       | 8.3%  |
| Fungal culture                                                               | 262                 | 16.8% | 53       | 12.9% |
| Microscopy                                                                   | 371                 | 23.7% | 91       | 22.2% |
| <i>Aspergillus</i> galactomannan antigen detection                           | 98                  | 6.3%  | 14       | 3.4%  |
| Serum IgE                                                                    | 633                 | 40.5% | 142      | 34.6% |
| Allergen-specific IgE                                                        | 349                 | 22.3% | 88       | 21.5% |
| Chest CT                                                                     | 624                 | 39.9% | 149      | 36.3% |
| Spirometry                                                                   | 786                 | 50.3% | 208      | 50.7% |
| Bronchoscopy                                                                 | 230                 | 14.7% | 44       | 10.7% |
| Outpatient medications in the 7 days before to 180 days after ABPA diagnosis |                     |       |          |       |
| Inhaled corticosteroids                                                      | 1106                | 70.7% | 296      | 72.2% |
| Systemic corticosteroids                                                     | 969                 | 62.0% | 266      | 64.9% |
| ≤7 days supply                                                               | 110                 | 11.4% | 44       | 16.5% |
| 8–14 days supply                                                             | 100                 | 10.3% | 26       | 9.8%  |
| 15–30 days supply                                                            | 168                 | 17.3% | 35       | 13.2% |
| ≥31 days supply                                                              | 591                 | 61.0% | 161      | 60.5% |
| Interleukin (IL)-5 agents                                                    | 37                  | 2.4%  | 10       | 2.4%  |
| Mepolizumab                                                                  | 23                  | 1.5%  | 7        | 1.7%  |
| Benralizumab                                                                 | 15                  | 1.0%  | 3        | 0.7%  |
| Additional monoclonal antibodies                                             | 129                 | 8.2%  | 31       | 7.6%  |
| Omalizumab                                                                   | 100                 | 6.4%  | 22       | 5.4%  |
| Dupilumab                                                                    | 29                  | 1.9%  | 10       | 2.4%  |
| Antifungals                                                                  | 397                 | 25.4% | 77       | 18.8% |

(Continued)



Table 4. (Continued)

| Characteristic                                                                | Commercial/Medicare |        | Medicaid |        |
|-------------------------------------------------------------------------------|---------------------|--------|----------|--------|
|                                                                               | n = 1,564           | %      | n = 410  | %      |
| Itraconazole                                                                  | 210                 | 13.4%  | 36       | 8.8%   |
| Voriconazole                                                                  | 182                 | 11.6%  | 39       | 9.5%   |
| Posaconazole                                                                  | 27                  | 1.7%   | 7        | 1.7%   |
| Both systemic corticosteroids and antifungals                                 | 313                 | 20.0%  | 64       | 15.6%  |
| Outcomes on or in the 180 days after ABPA diagnosis                           |                     |        |          |        |
| Hospitalized                                                                  | 352                 | 22.5%  | 185      | 45.1%  |
| Median days hospitalized (IQR)                                                | 5                   | (3–8)  | 6        | (3–12) |
| Bronchiectasis                                                                | 544                 | 34.8%  | 115      | 28.0%  |
| Respiratory failure                                                           | 171                 | 10.9%  | 76       | 18.5%  |
| Invasive aspergillosis                                                        | 41                  | 2.6%   | 7        | 1.7%   |
| Median number of healthcare visits in the 180 days after ABPA diagnosis (IQR) | 13                  | (6–23) | 13       | (6–26) |
| >1 healthcare visit for ABPA                                                  | 930                 | 59.5%  | 232      | 56.6%  |

ABPA: allergic bronchopulmonary aspergillosis; CT: computed tomography; IgE: immunoglobulin E; IQR: interquartile range.

<https://doi.org/10.1371/journal.pone.0317054.t004>

nationwide testing and treatment patterns for ABPA in the United States. ABPA prevalence was highest among patients with CF and among those with severe asthma, and we observed differences in prevalence by demographic characteristics and insurance type. Testing for ABPA appeared to be infrequent, suggesting that additional studies could help better understand testing practices and identify potential barriers to testing for ABPA.

Globally, the prevalence of ABPA among adult patients with asthma is estimated to be approximately 2.5 to 11% based on studies mainly from tertiary care centers [4, 5, 7]. In our analysis, the prevalence of ABPA was substantially lower, even specifically among patients with severe asthma (0.3%–0.7%). Our finding of increasing ABPA prevalence with increasing asthma severity contrasts with a recent study from India and may be related to higher ABPA testing rates among patients with severe asthma compared to those with mild asthma, which we did not evaluate [8]. The differences between our findings and previous studies are likely because of differences in study design and patient population, as our study included children and patients across all healthcare settings. Studies of ABPA prevalence worldwide also show that the reported prevalence varies greatly by country [4, 5, 7]. Our study suggests that geographic variation also occurs within the United States, with higher ABPA prevalence in the West and Midwest among patients with commercial health insurance. This finding is consistent with the geographic distribution of hospitalizations involving invasive aspergillosis [9] and with aspergillosis-related deaths [10]; however, the reasons for this pattern are unclear. Further investigation could improve understanding, particularly because the risk for developing ABPA is believed to be due to genetic rather than environmental factors [11, 12]. The higher rates of ABPA we observed among patients with severe asthma in rural areas is also intriguing because both asthma and invasive aspergillosis are more prevalent in urban areas [13, 14]. This association could be related to our finding that ABPA was most common in middle-age and older adults, who comprise a larger proportion of the population in rural areas [15]. Despite asthma being more common among female patients [16], we found that ABPA was more prevalent among male patients, similar to invasive aspergillosis and many other fungal infections [13]. By race and ethnicity, ABPA prevalence among patients with Medicaid appeared to mirror asthma prevalence in the general population [16] with the highest rates among non-Hispanic Black persons, followed by non-Hispanic White and Hispanic persons.



The slightly higher ABPA prevalence among patients in the Commercial/Medicare dataset compared with the Medicaid dataset is consistent with a nationwide study showing that rates of hospitalizations involving non-invasive aspergillosis were 11.1 per 100,000 population among patients with private insurance, 13.6 among those with Medicare, and 11.7 among those with Medicaid [13]. Asthma prevalence is higher among persons with lower socioeconomic status [16], so our findings suggest that the difference in ABPA by insurance type may be due to factors besides asthma prevalence. The difference could be related to the age distribution of the two study populations, since the Medicaid population is younger, and ABPA appears to more frequently affect adults. Another explanation involves differences in health-care seeking behavior or access (including access to specialists), as supported by the variation in provider type among patients with commercial/Medicare insurance vs. Medicaid. The differences could also be partly attributable to frequency of testing for ABPA among patients with severe asthma, which were slightly lower among patients with Medicaid. Notably, certain unfavorable outcomes (e.g., respiratory failure) were more common among patients with ABPA and Medicaid compared with those with commercial/Medicare insurance, which could be related to other factors influencing overall health status (e.g., smoking) or access to (or delays in) receiving medical care.

Overall, specific diagnostic testing for ABPA was uncommonly documented among patients with severe asthma or CF. Our study was designed to identify testing for ABPA within the 2 months before or after a patient's first diagnosis of severe asthma or CF in the study window, and it is possible that more testing could be identified with a longer time frame or with a focus on incident ABPA visits. Guidelines from the Infectious Diseases Society of America (IDSA) recommend testing for ABPA among patients with asthma in tertiary care settings and yearly screening for patients with asthma or CF [2]. Similarly, the International Society for Human and Animal Mycology (ISHAM) recommends *Aspergillus* IgE testing for adults newly diagnosed with asthma in tertiary care settings [1]. A reassuring finding is that a small proportion of patients with ABPA diagnosis codes were tested with fungal culture (17%) or *Aspergillus* galactomannan (<7%). Sputum culture is not explicitly recommended for diagnosing ABPA because of the low sensitivity and specificity but might be useful for monitoring response to therapy and understanding azole resistance [1]. *Aspergillus* galactomannan testing is also not recommended for diagnosing ABPA [1], but some patients with ABPA may have received this test for invasive pulmonary aspergillosis. Surveys of providers who most frequently see patients with severe asthma or CF, such as pulmonologists and healthcare providers based at acute care hospitals, might help better understand testing practices and identify possible gaps in and barriers to testing for ABPA. Prompt diagnosis of ABPA is important for improving outcomes because delayed treatment can lead to poor outcomes such as bronchiectasis and worsening lung function [17].

Most (>62%) patients with ABPA in this analysis received systemic corticosteroids, which are the mainstay of treatment for ABPA [1]. The median duration of steroid treatment in our analysis (<2 months) was shorter than the ISHAM-recommended 4-month tapered treatment course [1], although our study might underestimate total treatment duration because the databases do not contain information about medications administered in the inpatient setting. Oral itraconazole, received by 19–25% of patients with ABPA in this analysis, is the recommended alternative to corticosteroids; again, the prescribed days supply was shorter than the recommended 4 months. Over 15% of patients with ABPA received both systemic corticosteroids and antifungals at some point during the follow-up window. Concurrent use of steroids and antifungals is not recommended except for certain patients, such as those with eosinophilia, extensive bronchiectasis, or recurrent ABPA exacerbation [1]. We did not assess medication-related adverse effects, which can be substantial with corticosteroids and antifungals

[17], or patient adherence. We were also unable to evaluate medication dosages. Biologic treatments were infrequently used in this analysis (<9%); these are promising for difficult-to-control ABPA (for example, ABPA requiring repeated courses of corticosteroids or antifungals to control ABPA activity and symptoms) but have not been studied with large-scale trials [17]. Additional, more detailed analyses could help to identify patient- and provider-related factors associated with treatment type and association of treatment type with outcomes.

The median duration of nearly 4 months between patients' first and last ABPA-related visit and the substantial number of subsequent healthcare visits in the follow up period suggests that ABPA poses a considerable burden to patients. A slightly higher proportion of patients had their first ABPA-related visit during the summer, similar to findings from a study of invasive aspergillosis among patients who received hematopoietic stem cell transplants [18]. A better understanding of seasonal and climate factors influencing the risk for illness caused by *Aspergillus* could allow for recognition of higher-risk time periods. ABPA is believed to be uncommon in patients without either asthma or cystic fibrosis [19]; our results suggest that it may be more common than previously appreciated, or more likely, that we were unable to capture underlying conditions completely with ICD-10-CM codes recorded in the 180 days before the index date [20].

Our study is subject to several limitations, particularly underrepresentation and selection bias. Although the Medicaid data sample is drawn from geographically dispersed states, information about which states were included was not available. Therefore, geographic variation in Medicaid use may mean that our results do not necessarily reflect the entire Medicaid population. The Commercial/Medicare data are broadly representative of commercially insured persons throughout the United States, but our study does not represent people with other types of health insurance or people without health insurance.

Another major study limitation is under-detection inherently present in medical claims data, which may not capture all diagnoses or procedures. Misclassification of recorded diagnoses and procedures is another concern with claims data. Claims data have been widely used to study asthma, with a variety of case-finding algorithms. A systematic literature review of the validity of claims-based algorithms showed that use of  $\geq 1$  diagnostic code for asthma over a one-year period is generally a valid method to identify cases [20]. We chose to use this broad definition of asthma to obtain larger denominators of patients with asthma and calculate more conservative estimates of ABPA. Future studies can refine these estimates by using more restrictive or standardized definitions of asthma, such as the well-established Healthcare Effectiveness Data and Information Set persistent asthma criteria. Classifying asthma severity is challenging with claims data, and no clear ideal method exists to do so [21, 22]. We may have underestimated the number of patients with severe asthma if those patients received ICD-10-CM codes for unspecified asthma, which comprised a sizeable proportion of all patients with any asthma diagnosis. We are unaware of any studies demonstrating the ability of the ICD-10-CM code to accurately identify ABPA. For invasive mold infections, use of ICD-10-CM codes for case identification might miss 25% to 50% of cases [23]. Differences in ABPA coding may occur by provider type, which may influence our analysis given the variety of provider types visited by patients with ABPA. Furthermore, we were unable to identify ABPA exacerbations or conditions such as *Aspergillus* sensitization or chronic pulmonary aspergillosis using ICD-10-CM codes, and the datasets do not include information about laboratory, imaging, or spirometry test results or mortality. Lastly, the low rate of testing for ABPA among patients with severe asthma suggest that our results might under-estimate the true prevalence of ABPA if it is not being adequately tested for and diagnosed.

This study of real-world health insurance claims data provides an estimate of the prevalence of ABPA in the United States as well as insight into ABPA testing and treatment patterns.

These results can be used as a benchmark for future studies or public health surveillance to better define the burden of ABPA in the United States and to identify opportunities for improved strategies for ABPA prevention and treatment.

## Supporting information

**S1 Table. International Classification of Diseases, Tenth Revision, Clinical Modification (ICD-10-CM) and Current Procedural Terminology (CPT) codes used to identify diagnoses and procedures of interest.**  
(DOCX)

## Acknowledgments

- Disclaimer: The findings and conclusions in this report are those of the authors and do not necessarily represent the official position of the Centers for Disease Control and Prevention.
- This activity was reviewed by the CDC and was conducted consistent with applicable federal law and CDC policy (e.g., 45 C.F.R. part 46.102(l)(2), 21 C.F.R. part 56; 42 U.S.C. §241(d); 5 U.S.C. §552a; 44 U.S.C. §3501 et seq.).

## Author Contributions

**Conceptualization:** Kaitlin Benedict, Jeremy A. W. Gold, Mitsuru Toda, Joy Hsu.

**Formal analysis:** Kaitlin Benedict.

**Methodology:** Kaitlin Benedict, Jeremy A. W. Gold, Mitsuru Toda, Joy Hsu.

**Writing – original draft:** Kaitlin Benedict.

**Writing – review & editing:** Kaitlin Benedict, Jeremy A. W. Gold, Mitsuru Toda, Joy Hsu.

## References

1. Agarwal R, Sehgal IS, Muthu V, Denning DW, Chakrabarti A, Soundappan K, et al. Revised ISHAM-ABPA working group clinical practice guidelines for diagnosing, classifying and treating allergic bronchopulmonary aspergillosis/mycoses. *European Respiratory Journal*. 2024; 63(4):2400061. <https://doi.org/10.1183/13993003.00061-2024> PMID: 38423624
2. Patterson TF, Thompson GR III, Denning DW, Fishman JA, Hadley S, Herbrecht R, et al. Practice Guidelines for the Diagnosis and Management of Aspergillosis: 2016 Update by the Infectious Diseases Society of America. *Clinical Infectious Diseases*. 2016; 63(4):e1–e60. <https://doi.org/10.1093/cid/ciw326> PMID: 27365388
3. Cystic Fibrosis Foundation. Allergic Bronchopulmonary Aspergillosis Clinical Care Guidelines [10/3/2024]. Available from: <https://www.cff.org/medical-professionals/allergic-bronchopulmonary-aspergillosis-clinical-care-guidelines>.
4. Denning DW, Pleuvry A, Cole DC. Global burden of allergic bronchopulmonary aspergillosis with asthma and its complication chronic pulmonary aspergillosis in adults. *Med Mycol*. 2013; 51(4):361–70. Epub 20121204. <https://doi.org/10.3109/13693786.2012.738312> PMID: 23210682.
5. Agarwal R, Muthu V, Sehgal IS, Dhooria S, Prasad KT, Soundappan K, et al. Prevalence of Aspergillus Sensitization and Allergic Bronchopulmonary Aspergillosis in Adults With Bronchial Asthma: A Systematic Review of Global Data. *J Allergy Clin Immunol Pract*. 2023; 11(6):1734–51.e3. Epub 20230423. <https://doi.org/10.1016/j.jaip.2023.04.009> PMID: 37088374.
6. Hoehne JH, Reed CE, Dickie HA. Allergic Bronchopulmonary Aspergillosis is Not Rare: With a Note on Preparation of Antigen for Immunologic Tests. *Chest*. 1973; 63(2):177–81. <https://doi.org/10.1378/chest.63.2.177> PMID: 4631688
7. Maule M, Vitte J, Ambrosani F, Caminati M. Epidemiology of the relationship between allergic bronchopulmonary aspergillosis and asthma. *Curr Opin Allergy Clin Immunol*. 2024; 24(2):102–8. Epub 20240130. <https://doi.org/10.1097/ACI.0000000000000971> PMID: 38295145.

8. Sehgal IS, Saxena P, Dhooria S, Muthu V, Kathirvel S, Prasad KT, et al. Is the Prevalence of Allergic Bronchopulmonary Aspergillosis Greater in Severe Asthma? The Journal of Allergy and Clinical Immunology: In Practice. 2024. <https://doi.org/10.1016/j.jaip.2024.09.002>.
9. Vallabhaneni S, Benedict K, Derado G, Mody RK. Trends in Hospitalizations Related to Invasive Aspergillosis and Mucormycosis in the United States, 2000–2013. Open Forum Infect Dis. 2017; 4(1):ofw268. Epub 20170113. <https://doi.org/10.1093/ofid/ofw268> PMID: 28480260; PubMed Central PMCID: PMC5413990.
10. Gold JAW, Ahmad FB, Cisewski JA, Rossen LM, Montero AJ, Benedict K, et al. Increased Deaths From Fungal Infections During the Coronavirus Disease 2019 Pandemic—National Vital Statistics System, United States, January 2020–December 2021. Clinical Infectious Diseases. 2022; 76(3):e255–e62. <https://doi.org/10.1093/cid/ciac489> PMID: 35717660
11. Knutsen AP, Slavin RG. Allergic Bronchopulmonary Aspergillosis in Asthma and Cystic Fibrosis. Clinical and Developmental Immunology. 2011; 2011:843763. <https://doi.org/10.1155/2011/843763> PMID: 21603163
12. Agarwal R, Devi D, Gupta D, Chakrabarti A. A questionnaire-based study on the role of environmental factors in allergic bronchopulmonary aspergillosis. Lung India. 2014; 31(3):232–6. <https://doi.org/10.4103/0970-2113.135762> PMID: 25125809; PubMed Central PMCID: PMC4129594.
13. Rayens E, Rayens MK, Norris K. Demographic and Socioeconomic Factors Associated with Fungal Infection Risk, United States, 2019. Emerging Infectious Disease journal. 2022; 28(10):1955. <https://doi.org/10.3201/eid2810.220391> PMID: 36149028
14. Bryant-Stephens T. Asthma disparities in urban environments. J Allergy Clin Immunol. 2009; 123(6):1199–206; quiz 207–8. <https://doi.org/10.1016/j.jaci.2009.04.030> PMID: 19501229.
15. Cohen SA, Greaney ML. Aging in Rural Communities. Curr Epidemiol Rep. 2023; 10(1):1–16. Epub 20221109. <https://doi.org/10.1007/s40471-022-00313-9> PMID: 36404874; PubMed Central PMCID: PMC9644394.
16. CDC. Asthma Data, Statistics, and Surveillance [5/28/2024]. Available from: <https://www.cdc.gov/asthma/asthmadata.htm>.
17. Lewington-Gower E, Chan L, Shah A. Review of current and future therapeutics in ABPA. Therapeutic Advances in Chronic Disease. 2021; 12:20406223211047003. <https://doi.org/10.1177/20406223211047003> PMID: 34729149.
18. Panackal AA, Li H, Kontoyiannis DP, Mori M, Perego CA, Boeckh M, et al. Geoclimatic influences on invasive aspergillosis after hematopoietic stem cell transplantation. Clin Infect Dis. 2010; 50(12):1588–97. <https://doi.org/10.1086/652761> PMID: 20450414; PubMed Central PMCID: PMC3024009.
19. Acosta-Rivera V, Melendez-Montañez JM, De Jesús-Rojas W. Allergic Bronchopulmonary Aspergillosis With or Without Asthmatic Symptoms? Cureus. 2021; 13(6):e15498. Epub 20210607. <https://doi.org/10.7759/cureus.15498> PMID: 34268029; PubMed Central PMCID: PMC8262577.
20. Yousif A, Dault R, Courteau M, Blais L, Cloutier A-M, Lacasse A, et al. The validity of diagnostic algorithms to identify asthma patients in healthcare administrative databases: a systematic literature review. Journal of Asthma. 2022; 59(1):152–68. <https://doi.org/10.1080/02770903.2020.1827425> PMID: 32990481
21. Jacob C, Haas JS, Bechtel B, Kardos P, Braun S. Assessing asthma severity based on claims data: a systematic review. The European Journal of Health Economics. 2017; 18(2):227–41. <https://doi.org/10.1007/s10198-016-0769-2> PMID: 26931557
22. Al Sallakh MA, Vasileiou E, Rodgers SE, Lyons RA, Sheikh A, Davies GA. Defining asthma and assessing asthma outcomes using electronic health record data: a systematic scoping review. European Respiratory Journal. 2017; 49(6):1700204. <https://doi.org/10.1183/13993003.00204-2017> PMID: 28619959
23. Gold JAW, Revis A, Thomas S, Perry L, Blakney RA, Chambers T, et al. Clinical Characteristics, Health Care Utilization, and Outcomes Among Patients in a Pilot Surveillance System for Invasive Mold Disease—Georgia, United States, 2017–2019. Open Forum Infectious Diseases. 2022; 9(7). <https://doi.org/10.1093/ofid/ofac215> PMID: 35794945
